# Supplementary material
Source: MDPI journal article supplement (https://www.mdpi.com/2073-4352/11/9/1016)
Supplement: s1 [file s1 › crystals-1339875-supplementary.pdf]

# Thermoelectric properties of cubic $\text{Ag}_{1-x/2}\text{Bi}_{1-x/2}\text{Sn}_x\text{Se}_2$ solid solution

Xiao-Cun Liu<sup>1,\*</sup> and Ming-Yan Pan<sup>2</sup>

<sup>1</sup> School of Civil Engineering, Shandong Jiaotong University, Jinan, Shandong 250023, China

<sup>2</sup> Key Laboratory of Materials for High Power Laser, Shanghai Institute of Optics and Fine Mechanics, Chinese Academy of Science, Shanghai 201800, China

\* Correspondence: liuxiaocunde@163.com.

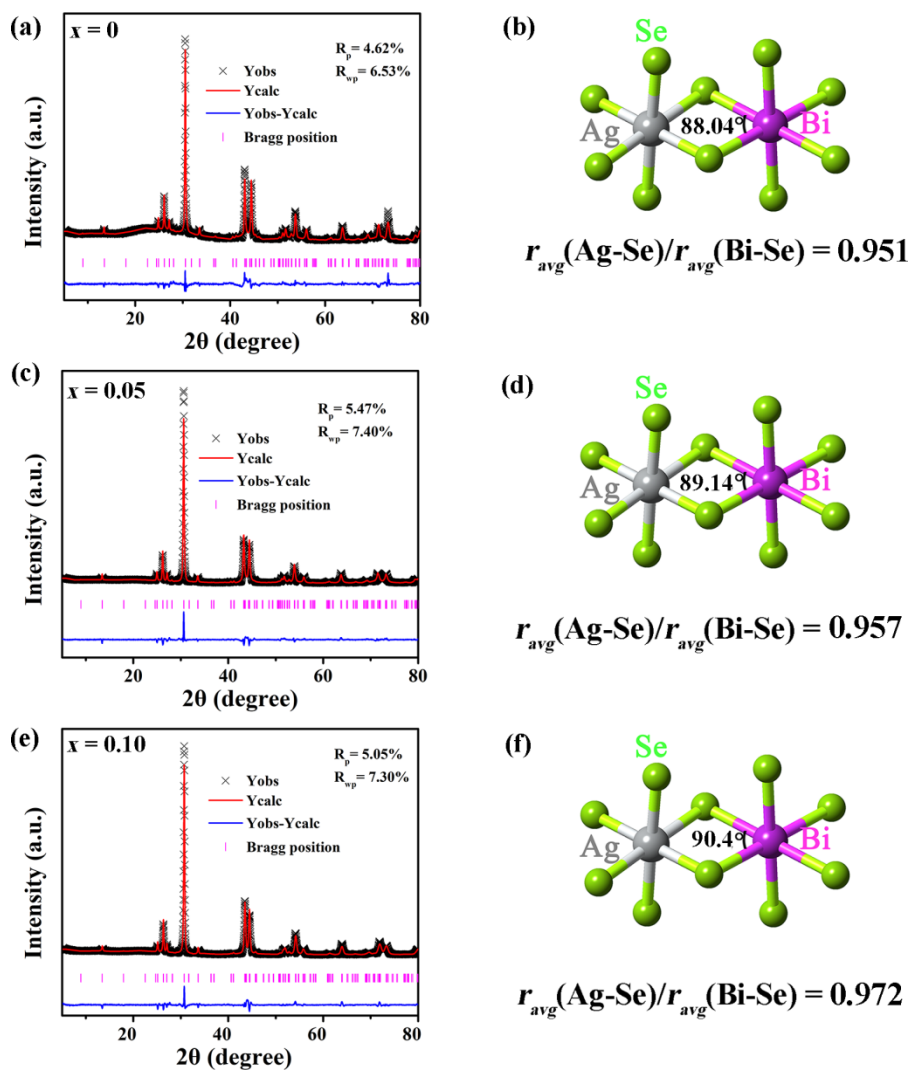

Figure S1. (a), (c) and (e) Rietveld refinements of  $\text{AgBiSe}_2$ ,  $\text{AgBiSe}_2$ ,  $\text{Ag}_{0.975}\text{Bi}_{0.975}\text{Sn}_{0.025}\text{Se}_2$ , and  $\text{Ag}_{0.95}\text{Bi}_{0.95}\text{Sn}_{0.10}\text{Se}_2$ . The  $r_{avg}(\text{Ag-Se})$ ,  $r_{avg}(\text{Bi-Se})$ ,  $r_{avg}(\text{Sb-Se})$  and  $r_{avg}(\text{As-Se})$ , in the figure are average bonding distances of Ag-Se, Bi-Se, Sb-Se and As-Se in octahedrons, respectively.

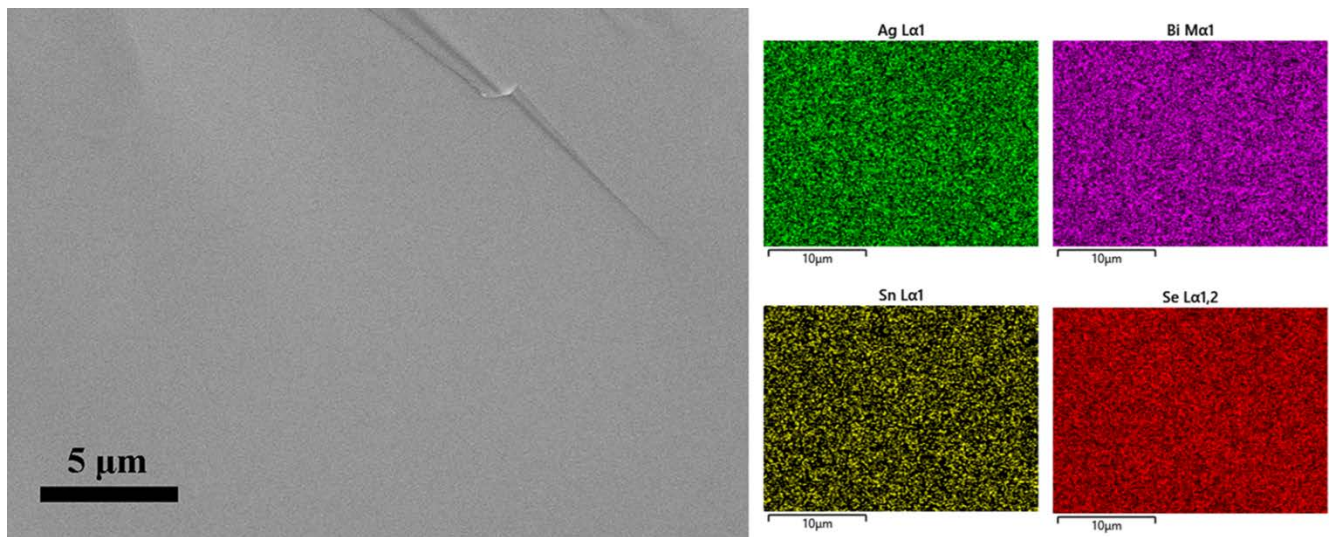

Figure S2. Cross-sectional SEM image and EDS mapping for sintered  $\text{Ag}_{0.90}\text{Bi}_{0.90}\text{Sn}_{0.20}\text{Se}_2$  sample.

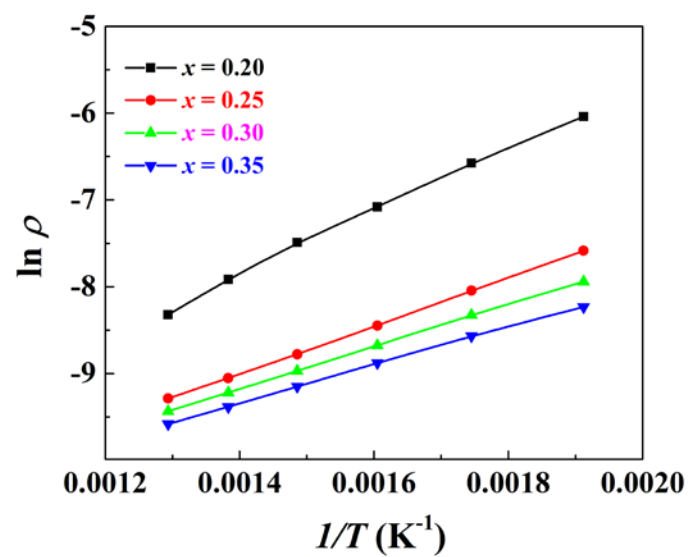

Figure S3. The  $\ln \rho$  versus  $1/T$  in the high-temperature region and linear regression for  $\text{Ag}_{1-x/2}\text{Bi}_{1-x/2}\text{Sn}_x\text{Se}_2$ .
